# Supplementary material for: Single-cell Transcriptomic Analysis of Eutopic Endometrium and Ectopic Lesions of Adenomyosis
Source: Research Square preprint supplement (doi:10.21203/rs.3.rs-127243/v1), 2020-12-16
Supplement: Supplementary file 1 [file f46f48e6f7fbafc40ba3c7a4.xlsx]

## Sheet: sampleid_AM_EC-vs-AM_EM-all_dif
Supplemental table 4. DEGs of AM_EC vs. AM_EM (epithelial cells)
gene	pvalue	pct.1	pct.2	padj	baseMean	FoldChange	log2FoldChange
CXCL8	8.091e-50	0.828	0.58	2.71356e-45	0.831247	2.71775	1.44241
CXCL2	4.28755e-35	0.496	0.272	1.43796e-30	-0.676327	2.39484	1.25993
BIRC3	1.81896e-81	0.687	0.367	6.10044e-77	-0.356402	2.3064	1.20564
ITGA2	4.87322e-60	0.673	0.394	1.63438e-55	-0.134412	2.21254	1.14571
EDN1	1.19858e-39	0.63	0.399	4.01978e-35	-0.0741424	2.07643	1.05411
ITGB8	7.49108e-70	0.849	0.586	2.51236e-65	0.480061	2.00031	1.00022
EZR	1.38547e-76	0.917	0.732	4.64659e-72	1.07772	1.97514	0.981952
TPM4	2.25833e-53	0.707	0.455	7.57397e-49	-0.200933	1.96512	0.974621
EMP1	7.32082e-46	0.806	0.589	2.45526e-41	0.381016	1.9493	0.962953
STC1	7.03079e-59	0.688	0.367	2.35799e-54	-0.365603	1.91994	0.941062
CCND1	3.77028e-56	0.7	0.435	1.26448e-51	-0.137572	1.91347	0.936194
DSP	2.72134e-69	0.811	0.542	9.12683e-65	0.168937	1.87903	0.909984
KCNQ1OT1	3.41664e-29	0.52	0.335	1.14587e-24	-0.740288	1.87248	0.90495
TACSTD2	1.87926e-50	0.869	0.652	6.30266e-46	0.889797	1.86285	0.897508
TNFAIP3	5.45982e-42	0.768	0.539	1.83111e-37	0.37315	1.86131	0.896317
PIGR	7.30022e-70	0.822	0.526	2.44835e-65	0.268895	1.85477	0.891239
LMO7	1.43022e-37	0.697	0.479	4.79666e-33	0.155999	1.79431	0.843428
RAB11FIP1	1.61453e-58	0.881	0.661	5.4148e-54	0.826125	1.78587	0.836626
PLAU	7.65538e-22	0.392	0.225	2.56746e-17	-1.12887	1.78566	0.836459
MBP	4.89422e-55	0.681	0.43	1.64142e-50	-0.272742	1.775	0.827815
NCL	8.39812e-92	0.945	0.754	2.81656e-87	0.745102	1.76863	0.822629
TEAD1	7.4034e-62	0.651	0.365	2.48295e-57	-0.677672	1.72738	0.788586
ETS2	1.06941e-53	0.881	0.697	3.5866e-49	0.621502	1.72033	0.782688
MT-ND6	1.83973e-79	0.52	0.168	6.17009e-75	-1.71423	1.71331	0.776786
ZNF292	2.95979e-51	0.652	0.399	9.92654e-47	-0.556687	1.71144	0.775208
IER3	6.29558e-28	0.974	0.877	2.11141e-23	1.63392	1.70117	0.766526
SQSTM1	7.1736e-64	0.957	0.801	2.40588e-59	1.17329	1.7001	0.765618
GOLGB1	7.09537e-71	0.757	0.458	2.37965e-66	-0.369176	1.69948	0.765097
YWHAZ	9.34324e-67	0.93	0.76	3.13354e-62	0.79689	1.69479	0.76111
GOLGA4	2.54727e-64	0.696	0.41	8.54302e-60	-0.531524	1.69467	0.761002
KLF3	2.47644e-55	0.75	0.484	8.3055e-51	-0.161995	1.69264	0.759272
ANKRD12	5.89405e-57	0.835	0.592	1.97675e-52	0.251886	1.68793	0.755257
RASEF	3.20469e-58	0.583	0.307	1.07479e-53	-1.02496	1.68358	0.751533
CDV3	1.31368e-54	0.855	0.646	4.40584e-50	0.451998	1.67991	0.748384
ATP13A3	7.53267e-53	0.686	0.424	2.52631e-48	-0.511477	1.64861	0.721252
KRT7	6.02384e-21	0.671	0.496	2.02028e-16	0.124681	1.64785	0.720588
TAC1	3.79038e-51	0.207	0.023	1.27122e-46	-3.65026	1.64286	0.71621
DENND2C	1.53269e-38	0.701	0.487	5.14033e-34	-0.138473	1.64124	0.714784
IL1R1	1.91329e-50	0.807	0.568	6.4168e-46	0.169812	1.63886	0.712692
CLDN1	1.14433e-28	0.536	0.323	3.83785e-24	-0.544377	1.6337	0.70814
SYNE2	3.33588e-53	0.849	0.635	1.11879e-48	0.297086	1.63297	0.707497
KLF6	6.20731e-51	0.983	0.883	2.08181e-46	1.58597	1.63205	0.706689
CD55	5.41637e-50	0.934	0.78	1.81654e-45	0.982604	1.63087	0.705639
UGCG	8.8479e-45	0.843	0.622	2.96741e-40	0.511584	1.62827	0.703338
AGPAT5	5.87153e-44	0.534	0.284	1.9692e-39	-1.10334	1.6225	0.698217
SMC5	4.97681e-61	0.623	0.32	1.66912e-56	-0.967368	1.62135	0.697194
ITGA6	2.4508e-51	0.642	0.361	8.21951e-47	-0.716503	1.61319	0.689916
HECTD1	1.57284e-43	0.702	0.471	5.27498e-39	-0.296791	1.61246	0.689266
LAMB3	1.86496e-22	0.449	0.292	6.25469e-18	-0.954647	1.6082	0.685451
SGMS2	1.01564e-43	0.707	0.488	3.40626e-39	-0.2771	1.60636	0.683799
CLU	1.20119e-31	0.845	0.678	4.02857e-27	0.630956	1.60465	0.682262
RAB3IP	1.18007e-44	0.572	0.339	3.95772e-40	-0.954907	1.60227	0.680117
TPM3	5.15474e-57	0.875	0.67	1.7288e-52	0.372672	1.59979	0.677879
TJP1	3.04416e-50	0.812	0.587	1.02095e-45	0.185403	1.59059	0.669559
PNPLA8	1.48399e-46	0.797	0.582	4.97702e-42	0.0594215	1.58736	0.666627
USP53	1.06564e-36	0.845	0.659	3.57393e-32	0.623953	1.58404	0.663605
ATF3	1.49239e-07	0.809	0.757	0.00500519	0.853762	1.58361	0.663218
ADGRF1	5.19067e-33	0.499	0.274	1.74085e-28	-1.07049	1.57927	0.659255
RARRES1	2.89453e-23	0.263	0.105	9.70767e-19	-2.06157	1.57853	0.65858
KRT17	1.13824e-26	0.142	0.029	3.81743e-22	-2.89676	1.57593	0.656203
COBL	3.42708e-43	0.467	0.244	1.14938e-38	-1.42902	1.57478	0.655153
TIPARP	2.26356e-38	0.718	0.516	7.59152e-34	-0.196977	1.57277	0.653312
MT-ND4L	1.98155e-69	0.966	0.807	6.64571e-65	1.01528	1.56662	0.647655
MMP7	8.35985e-09	0.311	0.206	0.000280373	-1.10405	1.55987	0.641428
GPRC5A	1.06314e-29	0.755	0.557	3.56557e-25	0.248488	1.5577	0.639413
MYO6	6.65691e-44	0.721	0.472	2.23259e-39	-0.25849	1.55664	0.638433
ETS1	4.09673e-48	0.644	0.37	1.37396e-43	-0.715296	1.55597	0.637817
NCEH1	5.21065e-37	0.569	0.335	1.74755e-32	-0.857194	1.55125	0.633431
CP	1.16091e-33	0.495	0.259	3.89345e-29	-0.965386	1.54942	0.63173
SNX9	2.52067e-41	0.747	0.503	8.45381e-37	-0.0166949	1.54842	0.630796
ARGLU1	5.52887e-50	0.765	0.519	1.85427e-45	-0.259303	1.5417	0.624525
DDX17	1.32985e-56	0.78	0.503	4.46004e-52	-0.241613	1.54112	0.623982
AKAP12	5.11263e-12	0.341	0.22	1.71467e-07	-1.38383	1.5405	0.623402
SPEN	4.29149e-41	0.613	0.37	1.43928e-36	-0.807695	1.53989	0.622827
MYOF	1.32676e-39	0.625	0.4	4.44969e-35	-0.682348	1.53855	0.621574
LAPTM4B	2.91569e-32	0.555	0.346	9.77864e-28	-0.906874	1.53801	0.621061
MET	6.73237e-34	0.633	0.418	2.2579e-29	-0.53173	1.53341	0.616747
FAM107B	2.80293e-33	0.776	0.587	9.40047e-29	0.214484	1.53292	0.616283
YWHAH	1.3266e-31	0.748	0.565	4.44914e-27	0.0711793	1.53067	0.614163
AFDN	1.17676e-48	0.738	0.496	3.94663e-44	-0.313035	1.52992	0.613458
SPTBN1	5.26418e-33	0.609	0.403	1.7655e-28	-0.662025	1.5296	0.613154
LAMC2	5.3929e-36	0.398	0.195	1.80867e-31	-1.68659	1.52705	0.610749
ELK3	4.84377e-30	0.599	0.389	1.6245e-25	-0.595899	1.52484	0.608662
LRRFIP1	1.68781e-38	0.779	0.572	5.66058e-34	0.0590146	1.51958	0.603677
NEAT1	5.79258e-58	0.989	0.951	1.94272e-53	1.83377	1.5174	0.601605
MACC1	1.41477e-29	0.391	0.2	4.74486e-25	-1.6093	1.51595	0.600224
HIVEP2	1.51129e-40	0.598	0.346	5.06857e-36	-0.859822	1.51581	0.60009
WWTR1	2.42417e-43	0.643	0.372	8.13017e-39	-0.674794	1.51481	0.599137
SDC4	5.84039e-37	0.663	0.44	1.95875e-32	-0.465568	1.50901	0.593605
ALKAL2	3.4548e-19	0.283	0.155	1.15867e-14	-2.11859	1.50721	0.591876
MMP1	1.42232e-49	0.255	0.047	4.77017e-45	-3.06387	1.50672	0.591407
NR1D2	4.22179e-29	0.681	0.492	1.4159e-24	-0.260056	1.50086	0.585788
KCNK6	4.27186e-45	0.348	0.125	1.43269e-40	-2.30907	1.49985	0.584817
NFKB1	5.2238e-38	0.605	0.357	1.75196e-33	-0.752664	1.4986	0.583613
KIAA1551	3.29774e-24	0.696	0.525	1.106e-19	-0.143537	1.49596	0.581069
UBE2H	7.70622e-49	0.875	0.641	2.58451e-44	0.538815	1.49391	0.57909
PARD6B	1.83464e-29	0.669	0.473	6.15303e-25	-0.343051	1.49288	0.578096
N4BP1	2.7691e-27	0.534	0.345	9.287e-23	-0.910035	1.48889	0.574233
LUC7L3	5.57124e-36	0.636	0.426	1.86848e-31	-0.639158	1.48457	0.570049
HMGA1	1.66773e-22	0.738	0.575	5.59325e-18	0.249993	1.48203	0.567571
EIF3A	2.31127e-46	0.796	0.564	7.75152e-42	-0.038899	1.48182	0.56737
ERO1A	9.19718e-37	0.648	0.417	3.08455e-32	-0.601099	1.47681	0.562484
SETX	3.9371e-31	0.483	0.275	1.32043e-26	-1.32105	1.47633	0.562015
YWHAE	1.22151e-48	0.874	0.669	4.09671e-44	0.293189	1.47494	0.560654
PRPF4B	8.10709e-46	0.634	0.358	2.71896e-41	-0.843501	1.47488	0.560596
BACH1	1.38906e-34	0.525	0.298	4.65864e-30	-1.19796	1.47424	0.559968
TXNRD1	4.15029e-31	0.77	0.558	1.39192e-26	0.1209	1.47394	0.559679
CTNNA1	1.9201e-40	0.73	0.501	6.43964e-36	-0.268061	1.47273	0.558497
ALCAM	5.90002e-41	0.691	0.445	1.97875e-36	-0.489858	1.47245	0.558214
RB1CC1	4.84785e-39	0.699	0.458	1.62587e-34	-0.445604	1.47227	0.558039
KRTAP2-3	2.6686e-09	0.132	0.062	8.94996e-05	-2.84108	1.47186	0.557639
ANKLE2	8.97682e-36	0.656	0.443	3.01065e-31	-0.571244	1.46928	0.555106
CTGF	1.58724e-10	0.568	0.552	5.32328e-06	-0.163349	1.46746	0.553317
CHMP4B	1.15884e-39	0.698	0.46	3.88652e-35	-0.452688	1.46679	0.552664
RIOK3	4.32286e-37	0.821	0.622	1.4498e-32	0.282922	1.46559	0.551478
CDH1	8.21823e-32	0.719	0.503	2.75623e-27	-0.192705	1.46494	0.55084
NRIP1	4.60652e-33	0.607	0.402	1.54494e-28	-0.716057	1.46168	0.547632
ANKRD11	2.58804e-42	0.608	0.352	8.67977e-38	-0.919444	1.45848	0.544465
TMOD3	1.83061e-37	0.56	0.326	6.13949e-33	-1.08346	1.45749	0.543486
ALDH1A3	7.10378e-19	0.253	0.127	2.38246e-14	-2.28253	1.45694	0.542943
AKAP13	4.04311e-36	0.781	0.56	1.35598e-31	-0.0307923	1.45591	0.541921
DHX9	4.10635e-41	0.65	0.41	1.37719e-36	-0.734656	1.45517	0.541191
HMGCS1	5.70775e-24	0.679	0.492	1.91426e-19	-0.232863	1.45294	0.538971
PAK2	9.46765e-37	0.584	0.338	3.17526e-32	-0.933024	1.45152	0.537564
NFE2L2	4.12879e-30	0.72	0.523	1.38471e-25	-0.158964	1.44977	0.535819
BRD4	7.31797e-42	0.626	0.38	2.4543e-37	-0.863744	1.44807	0.534127
CABLES1	1.61773e-26	0.544	0.354	5.42554e-22	-0.8676	1.44449	0.530557
F2RL1	6.20975e-28	0.67	0.472	2.08262e-23	-0.346946	1.44252	0.528588
LY6K	2.65511e-33	0.329	0.127	8.9047e-29	-2.15352	1.44224	0.528314
RHPN2	2.06213e-31	0.58	0.366	6.91596e-27	-0.863179	1.44196	0.528032
BCL10	1.74539e-33	0.737	0.518	5.85368e-29	-0.0977863	1.44103	0.527098
SIRT1	2.29431e-22	0.554	0.387	7.69467e-18	-0.814175	1.44083	0.526896
HSP90B1	4.01457e-32	0.857	0.676	1.34641e-27	0.384403	1.44064	0.526707
CD46	4.01433e-36	0.681	0.45	1.34633e-31	-0.548044	1.43768	0.523747
CD2AP	4.90411e-40	0.55	0.295	1.64474e-35	-1.20724	1.43659	0.522648
CYP1B1	3.52191e-31	0.38	0.172	1.18118e-26	-1.75639	1.43625	0.522305
PTTG1IP	1.3787e-32	0.735	0.525	4.6239e-28	-0.204837	1.43469	0.520738
GRAMD2B	3.22078e-19	0.5	0.333	1.08018e-14	-0.910554	1.43347	0.519512
RRBP1	2.97511e-30	0.705	0.501	9.97793e-26	-0.323675	1.43273	0.518763
RASA2	2.78747e-32	0.495	0.294	9.34862e-28	-1.30219	1.43215	0.518186
ABLIM1	5.54257e-30	0.387	0.206	1.85887e-25	-1.78086	1.43156	0.517593
ARHGAP5	4.61449e-25	0.695	0.516	1.54761e-20	-0.212472	1.43089	0.516908
LPIN1	1.57573e-20	0.417	0.263	5.28467e-16	-1.36351	1.42813	0.514127
CLIP1	1.19312e-35	0.595	0.368	4.00149e-31	-0.899439	1.42617	0.512147
ERRFI1	7.8369e-17	0.704	0.592	2.62834e-12	0.045144	1.4236	0.509543
DSG2	1.72958e-35	0.423	0.202	5.80066e-31	-1.76384	1.42221	0.508138
ANGPT2	2.63285e-18	0.202	0.08	8.83005e-14	-2.77866	1.42031	0.506201
PDK4	2.87459e-14	0.776	0.635	9.64081e-10	0.411094	1.42024	0.506134
VEZF1	4.18464e-37	0.504	0.276	1.40345e-32	-1.42102	1.41981	0.505699
ADSS	3.87915e-28	0.491	0.286	1.30099e-23	-1.25213	1.41931	0.50519
HNRNPK	2.22087e-42	0.886	0.706	7.44834e-38	0.452889	1.41812	0.503982
NEDD9	1.30153e-20	0.524	0.349	4.36507e-16	-0.867417	1.41794	0.503799
ASPH	1.82516e-28	0.591	0.382	6.12122e-24	-0.739247	1.41752	0.503365
MAL2	6.60278e-23	0.689	0.506	2.21444e-18	-0.0355713	1.41501	0.500816
NOV	1.31891e-20	0.264	0.122	4.42337e-16	-2.2895	1.41447	0.500261
MED13L	1.59249e-35	0.568	0.338	5.34089e-31	-1.05936	1.41414	0.499923
NDRG1	1.09012e-34	0.794	0.574	3.65603e-30	0.0367371	1.413	0.49876
IL18	1.88332e-21	0.44	0.259	6.31627e-17	-1.15647	1.41146	0.497192
WAC	2.97158e-33	0.634	0.411	9.96607e-29	-0.739429	1.40969	0.495378
REV3L	5.65217e-31	0.526	0.307	1.89562e-26	-1.15274	1.40857	0.494234
CCDC186	1.24515e-26	0.591	0.407	4.17599e-22	-0.80673	1.40817	0.493823
TAX1BP1	8.44861e-29	0.809	0.637	2.83349e-24	0.187115	1.40628	0.491886
FAM133B	3.93829e-31	0.692	0.487	1.32083e-26	-0.380311	1.40481	0.490375
IL1RN	3.08086e-27	0.23	0.079	1.03326e-22	-2.83649	1.40181	0.487291
PRRC2C	3.32215e-38	0.822	0.606	1.11418e-33	0.0928449	1.40074	0.486192
KCNK1	4.91632e-23	0.644	0.461	1.64884e-18	-0.365399	1.39706	0.482392
CDCP1	1.00886e-23	0.413	0.24	3.38352e-19	-1.4949	1.39698	0.482313
BASP1	1.11486e-20	0.657	0.472	3.73902e-16	-0.164462	1.39539	0.480668
WWC1	6.69569e-28	0.562	0.349	2.2456e-23	-0.943617	1.39504	0.480307
CCDC47	2.84399e-30	0.701	0.484	9.53817e-26	-0.361421	1.3946	0.47985
IGF2BP2	4.9537e-37	0.371	0.15	1.66137e-32	-2.08881	1.39425	0.479489
CMIP	3.43746e-40	0.391	0.162	1.15285e-35	-2.02338	1.39409	0.479322
SMAD2	5.37344e-29	0.465	0.265	1.80214e-24	-1.44195	1.38918	0.474236
SLC26A2	5.89063e-11	0.428	0.295	1.9756e-06	-0.764312	1.38722	0.472193
SKIL	1.09518e-24	0.509	0.323	3.67301e-20	-1.17345	1.38626	0.471198
SRRM1	1.51963e-28	0.733	0.547	5.09653e-24	-0.232265	1.38587	0.470794
UFM1	7.1787e-29	0.68	0.47	2.40759e-24	-0.442808	1.38338	0.468197
ZNF644	5.22073e-30	0.596	0.383	1.75093e-25	-0.851184	1.38275	0.467541
CPM	3.07144e-18	0.407	0.267	1.0301e-13	-1.43426	1.38154	0.466278
FOXO3	9.3268e-27	0.569	0.383	3.12802e-22	-0.921459	1.38081	0.465515
AGR3	6.98786e-12	0.109	0.036	2.34359e-07	-3.33767	1.38077	0.465473
AHNAK	3.63308e-28	0.736	0.546	1.21846e-23	-0.109484	1.37964	0.464291
INSIG1	2.48799e-24	0.565	0.364	8.34421e-20	-0.82552	1.37877	0.463379
HSPA5	7.516e-32	0.915	0.751	2.52072e-27	0.707773	1.37853	0.463132
IFNGR1	8.24682e-28	0.545	0.341	2.76582e-23	-1.03501	1.37846	0.46306
AGO2	4.83525e-28	0.559	0.358	1.62165e-23	-0.953529	1.37716	0.461697
CFTR	1.63415e-32	0.231	0.064	5.48063e-28	-3.02113	1.3766	0.46111
HIF1A	1.38297e-23	0.708	0.52	4.63819e-19	-0.263406	1.37649	0.460992
TARS	8.02946e-27	0.407	0.228	2.69292e-22	-1.64528	1.37558	0.460044
OCLN	8.81327e-25	0.705	0.504	2.95579e-20	-0.157458	1.37456	0.458968
PMEPA1	1.91142e-27	0.752	0.547	6.41052e-23	0.0959653	1.37391	0.458284
CANX	1.04914e-31	0.718	0.492	3.5186e-27	-0.399909	1.36986	0.454033
AMOTL2	1.70726e-23	0.617	0.426	5.72582e-19	-0.629219	1.36683	0.450832
SH2D4A	1.31862e-18	0.414	0.263	4.4224e-14	-1.4201	1.36621	0.450184
ESM1	1.90814e-29	0.201	0.051	6.39951e-25	-3.07503	1.3651	0.449002
ADAM9	3.35741e-29	0.51	0.303	1.12601e-24	-1.26507	1.36469	0.44857
PRPF38B	2.21819e-27	0.558	0.357	7.43935e-23	-1.0265	1.36456	0.448438
KTN1	1.5743e-35	0.762	0.526	5.27988e-31	-0.230969	1.36412	0.447973
LAMP2	2.95879e-28	0.681	0.471	9.92319e-24	-0.441497	1.36287	0.446646
SLC25A24	4.60719e-28	0.404	0.208	1.54516e-23	-1.74402	1.36234	0.446088
CAPN2	2.85287e-21	0.514	0.349	9.56796e-17	-1.02292	1.36089	0.444554
TRIP12	5.55332e-33	0.483	0.257	1.86247e-28	-1.51942	1.35941	0.442977
TUT7	1.84643e-19	0.617	0.441	6.19257e-15	-0.537176	1.35935	0.442921
B4GALT5	9.9432e-23	0.529	0.34	3.33475e-18	-0.990102	1.35935	0.442921
CAST	6.85667e-27	0.785	0.594	2.29959e-22	0.220287	1.35895	0.442495
CFLAR	7.76842e-22	0.542	0.366	2.60537e-17	-0.878058	1.35856	0.442079
SELE	3.01597e-13	0.127	0.047	1.0115e-08	-3.37807	1.35826	0.441761
RNPS1	5.27938e-31	0.649	0.429	1.7706e-26	-0.712963	1.3581	0.441594
YOD1	5.02119e-21	0.537	0.358	1.68401e-16	-0.905595	1.35752	0.44097
JAK1	1.24421e-28	0.689	0.48	4.17282e-24	-0.417785	1.35725	0.440687
MTUS1	1.6085e-21	0.51	0.336	5.39459e-17	-1.11789	1.35603	0.439384
NIPBL	6.80637e-30	0.55	0.33	2.28272e-25	-1.13634	1.35436	0.437616
SPAG9	9.68566e-28	0.805	0.616	3.24838e-23	0.201072	1.35386	0.437078
PSMD12	5.87188e-29	0.618	0.404	1.96931e-24	-0.75803	1.35299	0.43615
NFKBIZ	6.33392e-14	0.57	0.426	2.12427e-09	-0.534088	1.35203	0.435125
TOR1AIP2	2.2804e-23	0.6	0.41	7.648e-19	-0.817834	1.3519	0.434986
HERC4	6.87049e-22	0.585	0.406	2.30422e-17	-0.743848	1.35148	0.434538
CLINT1	5.53749e-26	0.541	0.34	1.85716e-21	-1.08763	1.35144	0.434495
OTUB2	1.53739e-28	0.371	0.181	5.15609e-24	-1.91426	1.35077	0.433785
PHF3	2.02883e-28	0.494	0.285	6.80428e-24	-1.33566	1.3504	0.433384
LRRFIP2	1.29366e-26	0.67	0.464	4.33866e-22	-0.482735	1.34986	0.432809
PTBP3	1.20045e-29	0.565	0.349	4.02608e-25	-1.03459	1.34921	0.432111
GCLM	7.40317e-24	0.591	0.39	2.48288e-19	-0.655493	1.3489	0.431781
ATP6V1C2	1.72454e-19	0.369	0.226	5.78377e-15	-1.75616	1.34885	0.431734
NFAT5	2.08015e-24	0.579	0.384	6.97641e-20	-0.848768	1.34805	0.430873
ZNF83	2.4628e-28	0.419	0.221	8.25973e-24	-1.73484	1.34723	0.429993
SRRM2	2.24531e-30	0.775	0.584	7.53031e-26	-0.0963486	1.34659	0.429315
SERPINB1	1.09391e-17	0.61	0.449	3.66875e-13	-0.254812	1.3458	0.428461
NFKBIA	1.70573e-22	0.917	0.773	5.72068e-18	1.07749	1.34506	0.42767
ELF3	9.06372e-30	0.934	0.797	3.03979e-25	1.24182	1.34505	0.427656
NABP1	2.93525e-20	0.72	0.566	9.84423e-16	-0.130432	1.34483	0.427429
S100A10	2.66619e-10	0.906	0.844	8.94186e-06	1.31992	1.34435	0.426909
CTNNB1	6.61734e-20	0.583	0.411	2.21933e-15	-0.800275	1.3437	0.426213
DIAPH1	1.20671e-25	0.523	0.325	4.04707e-21	-1.12744	1.34351	0.426005
DEK	7.01531e-32	0.726	0.502	2.3528e-27	-0.306757	1.34339	0.425876
KPNA4	7.39058e-29	0.666	0.45	2.47865e-24	-0.566863	1.34308	0.425548
NR2C1	1.67433e-26	0.377	0.196	5.61535e-22	-1.92629	1.34285	0.425295
CUL3	8.58169e-28	0.504	0.304	2.87813e-23	-1.33323	1.34114	0.423456
SWAP70	4.66618e-22	0.475	0.297	1.56494e-17	-1.3125	1.34003	0.422265
RUNX1	1.40735e-16	0.673	0.516	4.71998e-12	-0.276782	1.33987	0.42209
ARL4C	1.36623e-15	0.505	0.349	4.58205e-11	-0.886861	1.33815	0.420242
DDX21	1.64211e-25	0.787	0.618	5.5073e-21	0.0799382	1.33814	0.420234
GSPT1	5.13039e-24	0.625	0.443	1.72063e-19	-0.649966	1.33809	0.42017
SOWAHC	8.83146e-21	0.373	0.232	2.96189e-16	-1.74049	1.3376	0.419644
CTTNBP2NL	8.74788e-27	0.471	0.271	2.93386e-22	-1.41164	1.33691	0.418905
PKN2	6.39769e-23	0.531	0.343	2.14566e-18	-1.07295	1.33654	0.418505
SLC4A7	5.50545e-24	0.382	0.205	1.84642e-19	-1.82223	1.33553	0.41741
CD9	2.90376e-19	0.843	0.692	9.73863e-15	0.708418	1.33546	0.417341
GPCPD1	1.29999e-25	0.423	0.228	4.35992e-21	-1.62416	1.33539	0.417265
RTN3	1.86224e-27	0.635	0.418	6.24559e-23	-0.741539	1.33527	0.417131
MINDY2	2.85817e-23	0.44	0.261	9.58573e-19	-1.53067	1.33357	0.415295
LIF	1.61925e-08	0.33	0.246	0.000543065	-1.42132	1.33273	0.414381
SLFN5	9.81004e-22	0.341	0.178	3.29009e-17	-1.97358	1.33247	0.414098
PODXL	3.70292e-22	0.436	0.261	1.24189e-17	-1.48437	1.33241	0.414033
ARCN1	3.84213e-30	0.417	0.213	1.28857e-25	-1.79638	1.33234	0.413958
NSD3	1.30975e-25	0.546	0.35	4.39263e-21	-1.01388	1.33214	0.413743
RSL1D1	5.85904e-29	0.618	0.4	1.96501e-24	-0.789181	1.33208	0.413677
ZNF207	2.29871e-28	0.683	0.478	7.70941e-24	-0.557843	1.33202	0.413612
U2SURP	9.53817e-27	0.623	0.421	3.19891e-22	-0.737376	1.3319	0.413484
MACF1	6.48049e-22	0.627	0.447	2.17343e-17	-0.627261	1.33139	0.412928
GNG12	2.15884e-24	0.454	0.264	7.24031e-20	-1.47178	1.33037	0.41183
GSTP1	4.00925e-13	0.89	0.812	1.34462e-08	0.987047	1.33028	0.411734
CYTH1	1.14945e-25	0.428	0.241	3.85501e-21	-1.63481	1.32794	0.409186
ELF1	3.26342e-24	0.612	0.411	1.09449e-19	-0.773155	1.32677	0.407921
ZFAND5	3.01447e-26	0.89	0.74	1.01099e-21	0.556879	1.32676	0.407911
VNN1	1.84304e-08	0.235	0.162	0.000618119	-2.00117	1.32672	0.407866
PNN	4.83401e-28	0.749	0.544	1.62123e-23	-0.150104	1.3266	0.407731
NCOA4	4.39021e-32	0.487	0.26	1.47239e-27	-1.47785	1.32585	0.406919
ABI1	8.17194e-25	0.545	0.346	2.74071e-20	-1.07076	1.32519	0.406204
VPS4B	2.89167e-26	0.575	0.369	9.69807e-22	-0.941254	1.32511	0.406114
TNFAIP2	5.73501e-21	0.593	0.411	1.92341e-16	-0.674805	1.32457	0.405521
FGFBP1	2.06673e-16	0.175	0.065	6.93141e-12	-2.81152	1.32345	0.4043
N4BP2L2	2.36706e-28	0.659	0.442	7.93864e-24	-0.635814	1.32314	0.403964
PUM1	6.92561e-26	0.545	0.34	2.32271e-21	-1.09299	1.32248	0.403248
VCL	1.3253e-17	0.493	0.335	4.44479e-13	-1.04896	1.32238	0.403135
TOP1	4.46084e-22	0.773	0.601	1.49608e-17	0.0777237	1.32231	0.403065
TMEM30A	5.70946e-25	0.436	0.244	1.91484e-20	-1.59613	1.32206	0.40279
OXSR1	5.62656e-21	0.551	0.368	1.88703e-16	-0.95661	1.32143	0.402098
CDC42	3.54771e-30	0.88	0.722	1.18983e-25	0.534464	1.32123	0.401885
TRIB1	2.23305e-17	0.692	0.53	7.4892e-13	-0.215238	1.32099	0.401616
GADD45A	5.49786e-13	0.927	0.839	1.84387e-08	1.22248	1.32098	0.40161
C3	2.33773e-33	0.139	0.015	7.84027e-29	-4.30314	1.32051	0.401093
WEE1	3.87203e-16	0.668	0.521	1.2986e-11	-0.243094	1.32022	0.400776
MT-ATP8	6.14656e-26	0.674	0.468	2.06143e-21	-0.531172	1.32007	0.400616
SMARCA5	6.78995e-28	0.585	0.375	2.27721e-23	-0.971907	1.31996	0.40049
TNIP1	3.74565e-24	0.457	0.265	1.25622e-19	-1.37577	1.31869	0.399106
RHOF	6.49536e-17	0.412	0.282	2.17841e-12	-1.37645	1.31829	0.398664
RNF223	1.66454e-15	0.416	0.285	5.58254e-11	-1.36295	1.31812	0.398477
NOP56	8.70579e-21	0.63	0.455	2.91975e-16	-0.590403	1.31799	0.398337
G3BP1	1.18981e-27	0.662	0.454	3.99039e-23	-0.58091	1.31754	0.397841
TP53BP2	9.8156e-17	0.613	0.454	3.29196e-12	-0.527378	1.31727	0.397554
EIF4G2	1.31575e-31	0.902	0.745	4.41278e-27	0.544411	1.31677	0.397002
RAI14	1.49312e-18	0.336	0.184	5.00762e-14	-1.94007	1.31641	0.396614
BZW1	1.05063e-27	0.811	0.635	3.5236e-23	0.0929784	1.31596	0.396116
G3BP2	1.08855e-24	0.563	0.366	3.65079e-20	-1.01582	1.31539	0.395486
AKIRIN2	2.12935e-20	0.439	0.281	7.1414e-16	-1.49632	1.31527	0.395356
APP	5.63052e-23	0.574	0.374	1.88836e-18	-0.855447	1.31516	0.395235
CALCRL	1.65238e-10	0.212	0.115	5.54176e-06	-2.37031	1.31511	0.39518
SERINC1	2.18691e-26	0.618	0.415	7.33446e-22	-0.772217	1.31505	0.395121
BOD1L1	1.61559e-21	0.572	0.398	5.41835e-17	-0.876785	1.31303	0.392898
RAB5A	3.31742e-25	0.525	0.322	1.1126e-20	-1.26502	1.31227	0.392064
ATXN1	1.35689e-22	0.473	0.291	4.55073e-18	-1.32752	1.31207	0.391843
TGFA	3.41733e-21	0.332	0.175	1.14611e-16	-2.03556	1.31173	0.391469
RBM25	1.80528e-23	0.655	0.46	6.05455e-19	-0.608338	1.31116	0.39084
EHF	3.56757e-20	0.726	0.552	1.19649e-15	-0.112378	1.31042	0.390035
ATRX	1.5801e-22	0.504	0.317	5.29934e-18	-1.19333	1.3097	0.389238
SETD2	4.12959e-28	0.436	0.23	1.38498e-23	-1.68707	1.30851	0.387928
TM9SF2	6.90999e-25	0.431	0.239	2.31747e-20	-1.60239	1.30724	0.386523
FGD6	4.29992e-15	0.346	0.219	1.44211e-10	-1.76331	1.30682	0.386059
RPS6KB1	2.64872e-21	0.294	0.161	8.88327e-17	-2.33991	1.305	0.384047
PDCD6IP	1.9177e-22	0.489	0.308	6.43157e-18	-1.29759	1.30499	0.384035
BIRC2	6.67253e-26	0.485	0.283	2.23783e-21	-1.38667	1.30438	0.383366
NET1	5.28145e-17	0.705	0.548	1.77129e-12	-0.125427	1.30437	0.383355
RAP2B	8.75932e-17	0.691	0.522	2.9377e-12	0.0373328	1.30425	0.383218
MYH9	4.14933e-19	0.612	0.439	1.3916e-14	-0.550936	1.30408	0.383033
HNRNPAB	2.57069e-24	0.779	0.6	8.62158e-20	-0.00188213	1.30352	0.382416
IL6R	5.01727e-20	0.365	0.22	1.68269e-15	-1.84873	1.3025	0.381284
TMF1	2.45891e-21	0.537	0.365	8.24668e-17	-1.05052	1.30172	0.380414
TRIM44	8.90133e-22	0.347	0.182	2.98533e-17	-2.07792	1.30106	0.379685
RNF19A	1.44382e-17	0.618	0.459	4.84228e-13	-0.503283	1.30098	0.379596
MYO5B	4.41491e-21	0.431	0.256	1.48067e-16	-1.51727	1.30078	0.379375
PPP4R3A	2.48678e-22	0.466	0.294	8.34017e-18	-1.43851	1.30065	0.379232
C6orf132	2.39992e-21	0.489	0.303	8.04886e-17	-1.20214	1.30048	0.379046
ARL8B	1.9638e-19	0.605	0.428	6.58619e-15	-0.702728	1.30032	0.378865
AGFG1	1.32066e-25	0.497	0.299	4.42922e-21	-1.34395	1.29963	0.378104
SF3B1	5.04234e-32	0.763	0.541	1.6911e-27	-0.275119	1.29937	0.377811
TBC1D15	7.15543e-27	0.599	0.378	2.39979e-22	-0.876861	1.29933	0.377763
HDAC9	1.07016e-19	0.304	0.16	3.58912e-15	-2.23397	1.29852	0.376872
PPP2R2A	4.2961e-23	0.662	0.475	1.44083e-18	-0.540814	1.29794	0.376228
CREBRF	2.27546e-18	0.583	0.418	7.63144e-14	-0.764899	1.29764	0.375892
ANXA2	3.83948e-21	0.962	0.883	1.28768e-16	1.41028	1.29713	0.375323
RAD21	1.26642e-26	0.505	0.297	4.24732e-22	-1.31164	1.29615	0.374227
ADAMTS9	4.53515e-13	0.423	0.29	1.521e-08	-1.28455	1.29566	0.373684
SMG1	3.44544e-24	0.539	0.336	1.15553e-19	-1.14265	1.29504	0.372999
GALNT3	4.24641e-16	0.387	0.252	1.42416e-11	-1.60524	1.29408	0.371924
WDR43	2.11412e-19	0.458	0.292	7.09033e-15	-1.34763	1.29362	0.371418
ARHGAP29	3.74275e-16	0.526	0.367	1.25524e-11	-0.834383	1.29302	0.37074
SLAIN2	3.86133e-19	0.44	0.272	1.29501e-14	-1.44726	1.29237	0.370022
ADAM10	4.0107e-23	0.455	0.271	1.34511e-18	-1.54394	1.29236	0.370007
EXPH5	6.33563e-14	0.383	0.259	2.12484e-09	-1.54389	1.29206	0.369671
SLK	2.83348e-24	0.54	0.333	9.50292e-20	-1.10554	1.29165	0.369212
ZBTB1	2.8304e-21	0.392	0.224	9.49261e-17	-1.76555	1.29129	0.368817
CRK	1.02729e-22	0.455	0.273	3.44531e-18	-1.516	1.29071	0.368167
TES	6.65612e-22	0.717	0.531	2.23233e-17	-0.215381	1.29015	0.367543
GCNT3	2.73658e-14	0.326	0.198	9.17794e-10	-1.81391	1.29001	0.367385
SUCO	1.80439e-18	0.486	0.323	6.05158e-14	-1.2684	1.28962	0.366942
IRF1	4.26782e-16	0.636	0.494	1.43134e-11	-0.355233	1.28958	0.366896
IL6ST	1.4645e-36	0.859	0.644	4.91164e-32	0.315255	1.28957	0.366892
RHOA	1.82971e-23	0.785	0.605	6.13649e-19	0.0639608	1.28882	0.366054
FAM84B	3.05195e-17	0.641	0.47	1.02356e-12	-0.418402	1.28811	0.365252
SLTM	1.28323e-22	0.549	0.362	4.30368e-18	-1.05398	1.28787	0.36499
AL133453.1	2.78379e-16	0.396	0.252	9.33629e-12	-1.63723	1.28765	0.364737
USP12	1.02899e-17	0.552	0.391	3.45102e-13	-0.990724	1.28747	0.364536
CCDC174	2.42754e-23	0.344	0.186	8.14148e-19	-2.1451	1.28734	0.36439
XRCC5	4.54622e-22	0.549	0.353	1.52471e-17	-1.00904	1.28732	0.364376
TRIP11	1.01041e-21	0.381	0.207	3.38872e-17	-1.85492	1.28683	0.363816
ARHGAP26	3.8473e-21	0.366	0.204	1.29031e-16	-1.95784	1.28627	0.363192
KIAA1217	2.05362e-23	0.439	0.246	6.88743e-19	-1.60684	1.2857	0.362549
SLC20A2	2.05812e-14	0.422	0.281	6.90252e-10	-1.37352	1.28549	0.362314
BPTF	1.25841e-23	0.542	0.346	4.22046e-19	-1.07572	1.28519	0.361981
UTP25	1.20104e-20	0.346	0.19	4.02804e-16	-2.05594	1.28483	0.361577
PPP4R3B	3.92668e-22	0.385	0.211	1.31693e-17	-1.87994	1.28429	0.360967
BAMBI	3.38298e-07	0.153	0.208	0.0113458	-2.45139	0.778577	-0.361089
TOMM7	9.02434e-10	0.586	0.622	3.02658e-05	-0.332615	0.77827	-0.361657
RPS27A	5.09546e-15	0.984	0.986	1.70892e-10	1.43334	0.778127	-0.361923
NDUFA13	1.08559e-08	0.371	0.428	0.000364086	-1.20054	0.77812	-0.361935
NOP53	2.84872e-11	0.503	0.53	9.55403e-07	-0.727009	0.777911	-0.362323
EIF3K	2.09811e-07	0.499	0.543	0.00703663	-0.643169	0.777555	-0.362984
BLOC1S1	3.55079e-07	0.25	0.321	0.0119086	-1.7674	0.776925	-0.364153
CKS2	2.47966e-06	0.477	0.527	0.0831629	-0.367566	0.776032	-0.365812
COX7A2	1.74576e-17	0.701	0.67	5.85492e-13	0.0031193	0.77592	-0.366019
CLK1	1.03131e-09	0.614	0.632	3.4588e-05	-0.045741	0.775581	-0.366651
RPS5	5.06618e-17	0.926	0.902	1.69909e-12	0.983197	0.775571	-0.366669
MSX1	1.23598e-09	0.613	0.683	4.14523e-05	0.24783	0.774181	-0.369257
SPP1	0.00284461	0.186	0.212	1	-1.65378	0.773991	-0.369611
ATP5ME	7.86763e-07	0.504	0.516	0.0263865	-0.681093	0.772895	-0.371656
RPL12	1.18734e-15	0.956	0.954	3.98211e-11	1.18666	0.772583	-0.372239
ROMO1	3.10357e-06	0.337	0.4	0.104088	-1.29025	0.772313	-0.372743
RPS14	5.62588e-17	0.989	0.984	1.88681e-12	1.50042	0.771502	-0.374258
RPL10A	2.43118e-19	0.947	0.918	8.1537e-15	0.955487	0.77135	-0.374543
NDUFV2-AS1	3.7428e-10	0.095	0.178	1.25526e-05	-2.92482	0.771218	-0.374789
OCIAD2	1.61355e-09	0.449	0.46	5.41153e-05	-0.79165	0.770883	-0.375416
ATP5MD	5.14566e-11	0.633	0.619	1.72575e-06	-0.235974	0.769487	-0.378031
PLP2	2.55249e-08	0.303	0.384	0.000856053	-1.43827	0.769291	-0.378399
RPS11	1.54055e-21	0.935	0.902	5.16668e-17	0.853008	0.768771	-0.379373
RPS29	1.1338e-27	0.958	0.918	3.80255e-23	1.07147	0.768722	-0.379465
TUBA4A	3.63452e-08	0.418	0.492	0.00121895	-0.764102	0.767817	-0.381165
ATP5IF1	1.17002e-07	0.467	0.523	0.003924	-0.655523	0.767129	-0.382459
RPS12	2.37958e-21	0.99	0.987	7.98065e-17	1.56997	0.766685	-0.383295
RPL28	1.66388e-27	0.985	0.963	5.58034e-23	1.35311	0.766321	-0.383979
HLA-C	6.53849e-20	0.821	0.795	2.19288e-15	0.465939	0.765645	-0.385252
IFITM2	6.68214e-05	0.347	0.384	1	-1.13023	0.764358	-0.387679
SEC61G	1.03025e-17	0.683	0.64	3.45525e-13	-0.066914	0.764351	-0.387693
RPS27	2.26815e-36	0.994	0.979	7.60693e-32	1.55494	0.764311	-0.387768
EEF1B2	5.50784e-20	0.837	0.816	1.84722e-15	0.530351	0.76313	-0.389999
RPL14	1.30454e-18	0.947	0.945	4.37518e-14	1.14119	0.7631	-0.390057
JPT1	1.77519e-08	0.55	0.548	0.000595362	-0.380585	0.762947	-0.390345
RPL8	6.59156e-17	0.976	0.972	2.21068e-12	1.36738	0.761504	-0.393076
MZT2B	3.90306e-10	0.429	0.461	1.30901e-05	-0.939557	0.761445	-0.393187
MAOA	3.3206e-05	0.209	0.258	1	-1.85735	0.761061	-0.393916
SERPINH1	2.50676e-09	0.349	0.441	8.40717e-05	-1.00695	0.760096	-0.395746
CHCHD10	1.977e-14	0.102	0.214	6.63047e-10	-2.71795	0.759937	-0.396048
PHPT1	3.9148e-08	0.305	0.359	0.00131294	-1.50391	0.759784	-0.396339
RPS27L	1.06587e-07	0.485	0.548	0.00357473	-0.631729	0.759717	-0.396466
RPSA	9.57866e-22	0.827	0.796	3.21249e-17	0.479782	0.759685	-0.396526
ELOB	7.76523e-12	0.662	0.641	2.6043e-07	-0.117393	0.758744	-0.398315
PIK3R3	4.53469e-09	0.192	0.289	0.000152085	-1.86235	0.758489	-0.3988
FAM162A	1.7209e-09	0.099	0.178	5.77157e-05	-2.86027	0.758266	-0.399224
NDUFB8	3.79464e-09	0.291	0.38	0.000127265	-1.5018	0.7579	-0.399921
SGK1	2.50013e-07	0.719	0.718	0.00838494	0.481107	0.75727	-0.401121
RPS15A	1.96292e-21	0.968	0.959	6.58323e-17	1.24218	0.756384	-0.402809
HMGN2	4.46999e-08	0.471	0.532	0.00149915	-0.685484	0.756341	-0.402891
H2AFX	3.4504e-07	0.453	0.514	0.011572	-0.580181	0.755715	-0.404085
RPS15	5.30865e-23	0.975	0.968	1.78041e-18	1.27701	0.755431	-0.404628
CEBPB	2.13334e-20	0.741	0.724	7.15478e-16	0.336516	0.755141	-0.405182
SLC25A6	2.8914e-10	0.411	0.47	9.69719e-06	-0.971555	0.75481	-0.405814
CSKMT	3.26222e-12	0.138	0.249	1.09408e-07	-2.24186	0.754237	-0.406911
RPL32	2.80206e-24	0.994	0.976	9.39754e-20	1.43287	0.754027	-0.407313
NEDD8	6.17478e-08	0.402	0.422	0.0020709	-1.05276	0.753526	-0.408271
NDUFA4	1.6703e-14	0.734	0.724	5.60184e-10	0.174861	0.75268	-0.409891
ATP5MF	1.06542e-09	0.485	0.497	3.57319e-05	-0.749022	0.752391	-0.410446
GPX3	5.42396e-06	0.363	0.391	0.181909	-0.980352	0.752154	-0.410901
DNAJB4	2.08603e-08	0.51	0.565	0.000699614	-0.120681	0.750602	-0.41388
MT1A	4.29157e-07	0.169	0.233	0.0143931	-2.0744	0.750287	-0.414486
DDAH2	6.4912e-12	0.307	0.396	2.17702e-07	-1.45072	0.750192	-0.414668
RPL36	5.47642e-24	0.952	0.944	1.83668e-19	1.21884	0.750169	-0.414712
CDKN1C	2.86854e-09	0.317	0.423	9.62051e-05	-0.973552	0.749654	-0.415704
NDUFB4	2.37601e-11	0.544	0.579	7.96866e-07	-0.514517	0.749472	-0.416053
TMEM141	2.73116e-09	0.113	0.182	9.15975e-05	-2.68254	0.749241	-0.416498
S100A4	1.58336e-07	0.127	0.202	0.00531026	-2.4981	0.748748	-0.417448
ATP5MC2	1.75337e-07	0.475	0.529	0.00588045	-0.622256	0.748418	-0.418085
RPS13	1.28424e-29	0.971	0.966	4.30708e-25	1.28847	0.748242	-0.418422
TMEM258	1.11724e-10	0.458	0.503	3.74698e-06	-0.773975	0.747317	-0.420207
MGST3	5.22178e-10	0.508	0.564	1.75128e-05	-0.486331	0.746055	-0.422646
HERPUD1	7.74126e-14	0.623	0.635	2.59626e-09	-0.109504	0.745997	-0.422758
COX7B	7.50445e-17	0.664	0.677	2.51684e-12	-0.104756	0.745896	-0.422953
COX6B1	2.20095e-16	0.583	0.58	7.38156e-12	-0.391899	0.74564	-0.42345
DDT	2.95225e-09	0.447	0.505	9.90125e-05	-0.816297	0.744345	-0.425956
ATP5MC1	7.32218e-08	0.225	0.298	0.00245571	-1.92745	0.744117	-0.426399
RPS18	1.51119e-29	0.997	0.996	5.06824e-25	1.68464	0.744018	-0.426591
RPS24	3.13583e-20	0.989	0.983	1.0517e-15	1.41603	0.743677	-0.427251
HOXB5	7.23079e-13	0.16	0.278	2.42506e-08	-2.14231	0.742105	-0.430305
RPL22	1.38759e-16	0.894	0.88	4.65372e-12	0.731477	0.741967	-0.430573
VAMP8	2.2466e-09	0.364	0.404	7.53466e-05	-1.16295	0.741883	-0.430737
ATP5PF	1.35727e-09	0.536	0.572	4.55202e-05	-0.531818	0.741651	-0.431187
UQCR10	1.52778e-14	0.557	0.552	5.12387e-10	-0.518704	0.740726	-0.432988
TMSB4X	4.87815e-20	0.993	0.992	1.63603e-15	1.70052	0.739866	-0.434664
RPL11	7.65386e-23	0.985	0.973	2.56695e-18	1.41972	0.739841	-0.434712
ISG15	8.01163e-05	0.382	0.412	1	-1.05157	0.739294	-0.435781
COX5B	1.09086e-12	0.548	0.563	3.65854e-08	-0.516512	0.738913	-0.436524
RPL7A	4.28389e-21	0.975	0.965	1.43673e-16	1.2488	0.738705	-0.43693
RPL37A	1.80872e-22	0.966	0.965	6.06609e-18	1.17193	0.738681	-0.436978
RPL18	1.17845e-30	0.978	0.982	3.95228e-26	1.45018	0.738433	-0.437461
RPL34	2.75613e-26	0.99	0.973	9.24352e-22	1.37777	0.738243	-0.437833
PFDN5	2.61218e-15	0.736	0.757	8.76073e-11	0.171953	0.736902	-0.440456
RPL30	1.47156e-27	0.985	0.977	4.93533e-23	1.41815	0.736573	-0.441101
RPL27	3.06442e-26	0.923	0.905	1.02775e-21	0.918454	0.736452	-0.441338
FAU	8.13454e-41	0.985	0.973	2.72816e-36	1.48858	0.736448	-0.441344
RPL3	3.50579e-30	0.981	0.971	1.17577e-25	1.31634	0.73587	-0.442478
ZFAS1	4.27923e-32	0.832	0.805	1.43517e-27	0.641744	0.735271	-0.443652
HIST1H2BH	1.25343e-23	0.015	0.113	4.20374e-19	-4.47884	0.734174	-0.445805
FIS1	1.31132e-10	0.24	0.309	4.3979e-06	-1.80443	0.734152	-0.44585
SERP1	2.98406e-40	0.806	0.759	1.00079e-35	0.436717	0.734035	-0.446079
AL451085.1	6.21104e-23	0.03	0.14	2.08306e-18	-3.82862	0.733805	-0.446531
TPI1	2.32817e-23	0.705	0.701	7.80822e-19	0.0402783	0.733763	-0.446614
TBCC	3.5982e-10	0.297	0.391	1.20677e-05	-1.45725	0.733735	-0.446669
PRDX1	4.61947e-35	0.9	0.862	1.54928e-30	0.900072	0.73357	-0.446993
UQCRQ	7.93282e-12	0.436	0.491	2.66051e-07	-0.920506	0.733134	-0.447851
NDUFB2	8.26947e-15	0.55	0.547	2.77342e-10	-0.505882	0.733123	-0.447873
PRDX5	5.02093e-14	0.541	0.594	1.68392e-09	-0.380911	0.732809	-0.44849
PPDPF	8.81568e-08	0.253	0.314	0.0029566	-1.70858	0.73264	-0.448824
UBA52	7.63974e-27	0.921	0.897	2.56221e-22	0.888636	0.732563	-0.448974
ATP5MG	1.71844e-16	0.676	0.69	5.76329e-12	-0.0474459	0.731496	-0.451078
ATP5MC3	3.3812e-09	0.325	0.392	0.000113399	-1.30491	0.730842	-0.452368
NDUFB11	1.83067e-17	0.458	0.539	6.13969e-13	-0.78464	0.728873	-0.45626
HNMT	5.15296e-10	0.249	0.34	1.7282e-05	-1.59714	0.728859	-0.456289
LINC01320	5.46336e-08	0.261	0.354	0.0018323	-1.40498	0.72883	-0.456346
RPL35A	2.47018e-30	0.979	0.965	8.2845e-26	1.30097	0.72851	-0.456979
ARPC3	4.257e-16	0.734	0.717	1.42771e-11	0.170767	0.727749	-0.458487
RPL24	5.78343e-43	0.985	0.973	1.93965e-38	1.51728	0.724057	-0.465826
SAP18	1.45217e-21	0.844	0.809	4.8703e-17	0.555668	0.72366	-0.466616
HLA-B	1.90873e-37	0.917	0.886	6.40151e-33	0.967595	0.723153	-0.467628
IFI27	6.8346e-07	0.831	0.803	0.0229219	0.774557	0.723149	-0.467636
BCAS2	4.65717e-17	0.544	0.544	1.56192e-12	-0.470941	0.723004	-0.467925
RPL26	1.02152e-34	0.985	0.973	3.42597e-30	1.37144	0.721772	-0.470385
ARG2	5.04449e-12	0.436	0.512	1.69182e-07	-0.711208	0.721088	-0.471752
RPS3	5.1852e-24	0.971	0.973	1.73901e-19	1.25554	0.719941	-0.474049
C11orf96	2.59312e-19	0.74	0.807	8.69681e-15	0.697215	0.71971	-0.474513
EDF1	6.86078e-13	0.566	0.606	2.30097e-08	-0.365871	0.719069	-0.475799
C4orf3	2.58156e-10	0.343	0.412	8.65804e-06	-1.22915	0.718372	-0.477197
PTGDS	5.00802e-17	0.05	0.151	1.67959e-12	-3.41494	0.718114	-0.477716
RPL29	4.02002e-26	0.921	0.927	1.34823e-21	0.989356	0.718094	-0.477756
RARRES3	5.55476e-06	0.208	0.243	0.186295	-1.827	0.717471	-0.479008
SEM1	5.5368e-23	0.686	0.686	1.85693e-18	-0.0351196	0.717411	-0.479129
IFIT1	1.55104e-06	0.061	0.108	0.0520189	-3.31791	0.717304	-0.479342
RPL36A	2.67281e-13	0.593	0.639	8.96406e-09	-0.303957	0.71674	-0.480479
ANXA4	1.77699e-07	0.267	0.316	0.00595967	-1.51013	0.71599	-0.481989
UQCR11	9.11448e-13	0.346	0.434	3.05682e-08	-1.17039	0.714386	-0.485224
RPL23A	2.22973e-32	0.959	0.943	7.47807e-28	1.10976	0.714346	-0.485305
RPS25	3.58574e-37	0.959	0.936	1.20258e-32	1.0841	0.714188	-0.485624
CST3	1.48825e-14	0.628	0.629	4.9913e-10	-0.119672	0.713448	-0.487121
RPL19	2.09132e-24	0.972	0.975	7.01386e-20	1.2877	0.713398	-0.487221
GPX4	4.71916e-23	0.742	0.719	1.58271e-18	0.297791	0.711565	-0.490932
SNHG9	6.176e-12	0.247	0.327	2.07131e-07	-1.65928	0.709528	-0.495069
CSRP1	3.2694e-10	0.387	0.456	1.09649e-05	-1.0472	0.709084	-0.495971
RPS23	2.90744e-26	0.985	0.976	9.75096e-22	1.34359	0.709081	-0.495979
CYBA	3.60982e-09	0.442	0.512	0.000121066	-0.561516	0.708126	-0.497922
MSX2	1.00794e-12	0.221	0.336	3.38043e-08	-1.75665	0.707331	-0.499543
CCL20	0.0963287	0.11	0.108	1	-2.07075	0.706284	-0.50168
RPL37	4.94384e-34	0.961	0.962	1.65807e-29	1.1687	0.703879	-0.5066
TUBA1B	6.07983e-36	0.82	0.797	2.03905e-31	0.46765	0.703445	-0.50749
PRDX2	1.11808e-12	0.206	0.309	3.74981e-08	-1.8499	0.703167	-0.508061
SOD1	3.50111e-29	0.777	0.799	1.1742e-24	0.439645	0.702216	-0.510013
VCAN	3.83527e-14	0.141	0.269	1.28627e-09	-2.10761	0.700749	-0.51303
MGST1	6.38318e-06	0.447	0.501	0.214079	-0.497898	0.699178	-0.516269
COX7C	1.75134e-14	0.612	0.651	5.87366e-10	-0.211734	0.696789	-0.521207
RPAIN	2.13513e-16	0.544	0.543	7.16081e-12	-0.390492	0.696188	-0.522451
RPS19	2.27371e-35	0.988	0.985	7.62557e-31	1.40347	0.695187	-0.524527
SCGB2A2	1.0837e-05	0.077	0.117	0.36345	-2.84635	0.693426	-0.528186
MRPL18	8.65605e-18	0.568	0.648	2.90307e-13	-0.107856	0.692357	-0.530413
DBI	1.55783e-12	0.308	0.4	5.22466e-08	-1.34805	0.691365	-0.53248
NDUFA1	5.19981e-14	0.484	0.574	1.74391e-09	-0.596347	0.691024	-0.533193
DDIT3	2.01356e-13	0.454	0.541	6.75309e-09	-0.485025	0.69059	-0.534099
MT1F	4.37831e-14	0.311	0.453	1.4684e-09	-0.976793	0.689912	-0.535515
BAG3	2.53011e-17	0.628	0.663	8.48549e-13	0.260936	0.688182	-0.539137
RPS9	3.55432e-55	0.983	0.979	1.19205e-50	1.42415	0.686766	-0.54211
ATP5F1D	4.88843e-12	0.304	0.391	1.63948e-07	-1.40078	0.68657	-0.542521
SELENOM	4.22346e-12	0.213	0.301	1.41646e-07	-1.80735	0.685211	-0.54538
HINT1	9.97635e-13	0.691	0.722	3.34587e-08	0.133351	0.684733	-0.546386
PCK1	8.93471e-12	0.041	0.114	2.99652e-07	-3.443	0.684622	-0.54662
ATP5F1E	1.12595e-25	0.868	0.862	3.77621e-21	0.736367	0.682821	-0.550421
HLA-A	2.38401e-46	0.892	0.847	7.9955e-42	0.78953	0.682525	-0.551046
RPL41	3.47596e-62	1	0.995	1.16577e-57	1.81357	0.68028	-0.555799
RPS21	1.57396e-48	0.887	0.878	5.27874e-44	0.779022	0.679457	-0.557545
RPS10	8.7583e-44	0.926	0.912	2.93736e-39	0.929528	0.677262	-0.562214
SRP14	4.15423e-34	0.884	0.877	1.39324e-29	0.778343	0.676558	-0.563715
MDK	6.96029e-10	0.331	0.416	2.33434e-05	-1.13859	0.673715	-0.569789
G0S2	4.01616e-06	0.137	0.203	0.134694	-2.07252	0.67113	-0.575335
AC015912.3	2.13772e-17	0.32	0.404	7.16948e-13	-1.21769	0.667978	-0.582127
RPL10	4.97715e-60	1	0.997	1.66924e-55	1.79292	0.667024	-0.584189
HIST1H4C	6.79484e-21	0.512	0.596	2.27885e-16	-0.307019	0.665922	-0.586574
GAPDH	5.66478e-30	0.9	0.896	1.89985e-25	0.898609	0.665424	-0.587653
SELENOW	4.72196e-22	0.485	0.617	1.58365e-17	-0.443641	0.665346	-0.587823
MYLK	1.21369e-12	0.211	0.323	4.07046e-08	-1.66511	0.66528	-0.587965
C6orf48	8.26246e-16	0.442	0.539	2.77106e-11	-0.525802	0.665019	-0.588531
SSR4	6.77975e-20	0.547	0.61	2.27379e-15	-0.335725	0.663678	-0.591444
OST4	1.30579e-13	0.501	0.549	4.37937e-09	-0.541217	0.658761	-0.602172
ID2	2.84159e-11	0.515	0.608	9.53012e-07	0.125808	0.654565	-0.611391
RAMP1	3.26669e-18	0.156	0.3	1.09558e-13	-1.95811	0.651917	-0.617239
SOX4	3.44036e-16	0.753	0.761	1.15383e-11	0.65931	0.650732	-0.619864
ID3	1.07435e-10	0.604	0.668	3.60315e-06	0.32067	0.648577	-0.624649
MGP	5.88406e-14	0.34	0.459	1.9734e-09	-0.930231	0.647802	-0.626376
DYNLL1	4.65912e-44	0.893	0.895	1.56258e-39	0.971841	0.644077	-0.634695
DNAJB1	7.39832e-24	0.79	0.871	2.48125e-19	1.1232	0.643917	-0.635054
RPS4X	1.05787e-39	0.973	0.973	3.54789e-35	1.25195	0.643152	-0.636768
UBC	1.71362e-40	0.992	0.989	5.74714e-36	1.88263	0.641857	-0.639676
MT1H	3.96625e-09	0.123	0.205	0.00013302	-2.23366	0.639153	-0.645767
RPL39	4.81987e-72	0.995	0.989	1.61649e-67	1.62476	0.638048	-0.648264
SCGB2A1	1.20538e-05	0.773	0.744	0.404262	0.790693	0.637216	-0.650145
SERF2	2.38741e-47	0.867	0.87	8.0069e-43	0.736231	0.634357	-0.656633
FTL	7.2701e-30	0.997	0.995	2.43825e-25	1.75562	0.630714	-0.664942
LINC01480	1.02939e-18	0.11	0.243	3.45236e-14	-2.29204	0.629994	-0.666591
HSPB1	1.89901e-40	0.974	0.972	6.3689e-36	1.74279	0.629924	-0.66675
UQCRB	5.78995e-23	0.562	0.671	1.94183e-18	-0.276907	0.628089	-0.670958
SNHG8	1.39344e-23	0.667	0.7	4.67332e-19	0.242641	0.627755	-0.671727
RPL27A	1.4365e-57	0.938	0.954	4.81774e-53	1.08358	0.626491	-0.674635
TUBA1A	2.49962e-22	0.498	0.602	8.38321e-18	-0.451759	0.621267	-0.686715
AL118516.1	2.87276e-17	0.274	0.406	9.63468e-13	-1.27977	0.619707	-0.690341
DUSP2	4.44764e-08	0.339	0.445	0.00149165	-0.488627	0.618569	-0.692993
DEFB1	5.55484e-20	0.621	0.695	1.86298e-15	0.259044	0.617462	-0.695579
SELENOK	1.57722e-47	0.637	0.674	5.28966e-43	-0.0117684	0.615477	-0.700223
HSPA8	7.51842e-27	0.814	0.885	2.52153e-22	1.10765	0.611246	-0.710175
ANKRD37	1.18338e-12	0.403	0.481	3.96881e-08	-0.464037	0.61065	-0.711582
MT1E	5.38206e-20	0.729	0.777	1.80504e-15	0.827645	0.604607	-0.72593
RGS2	8.39682e-17	0.175	0.296	2.81613e-12	-1.7596	0.598942	-0.739512
NDUFS5	9.47428e-35	0.599	0.699	3.17749e-30	-0.127082	0.59543	-0.747996
SCGB1D2	0.177278	0.103	0.117	1	-2.37815	0.594613	-0.749976
MT1X	3.829e-18	0.516	0.609	1.28417e-13	0.117202	0.592225	-0.755782
CRYAB	6.49385e-30	0.885	0.953	2.17791e-25	1.61613	0.584325	-0.775156
CTSC	6.13251e-09	0.11	0.178	0.000205672	-2.61595	0.583076	-0.778244
IER5	7.78025e-20	0.516	0.534	2.60934e-15	-0.36545	0.581475	-0.782212
ZFAND2A	8.17787e-23	0.604	0.646	2.7427e-18	0.203446	0.576739	-0.794009
IER5L	2.05697e-20	0.54	0.625	6.89867e-16	0.122982	0.575453	-0.79723
HSP90AA1	4.59896e-45	0.998	0.998	1.5424e-40	2.04184	0.574269	-0.800201
COX6C	3.33822e-32	0.574	0.681	1.11957e-27	-0.204233	0.572913	-0.803613
MT2A	5.28756e-35	0.986	0.981	1.77334e-30	1.6806	0.572863	-0.803739
TXNIP	7.71752e-21	0.558	0.677	2.5883e-16	0.192284	0.571492	-0.807195
SLPI	7.46992e-30	0.812	0.806	2.50526e-25	0.882526	0.571019	-0.808391
ACTA2	2.76653e-29	0.251	0.46	9.2784e-25	-1.2713	0.56623	-0.82054
HSPE1	2.29542e-68	0.912	0.93	7.69839e-64	1.27035	0.551137	-0.859518
MT1M	1.2077e-19	0.277	0.432	4.05037e-15	-0.84822	0.546085	-0.872801
CNN1	2.37684e-40	0.15	0.382	7.97146e-36	-1.85155	0.542453	-0.882431
TPM1	7.57971e-32	0.541	0.718	2.54208e-27	-0.197337	0.539382	-0.89062
HSPA1B	2.14637e-37	0.756	0.875	7.19851e-33	1.13816	0.536972	-0.897081
ID1	1.42811e-20	0.557	0.674	4.78959e-16	0.255721	0.533282	-0.90703
TCEAL9	1.3691e-34	0.387	0.558	4.59168e-30	-0.543732	0.525757	-0.927532
PAEP	1.23004e-15	0.626	0.731	4.1253e-11	0.966323	0.509996	-0.971443
S100A2	1.01221e-07	0.192	0.136	0.00339476	-2.49069	0.506966	-0.98004
MYL9	4.92088e-38	0.324	0.547	1.65036e-33	-0.897515	0.506511	-0.981335
DDIT4	4.7713e-21	0.4	0.467	1.6002e-16	-0.588158	0.499981	-1.00005
LGALS1	3.05959e-60	0.662	0.86	1.02613e-55	0.27233	0.48444	-1.04561
CXCL14	5.18709e-27	0.442	0.619	1.73965e-22	0.0910519	0.450264	-1.15116
C15orf48	7.33819e-59	0.049	0.288	2.46108e-54	-2.52654	0.432026	-1.21081
MT1G	1.41213e-28	0.463	0.625	4.73602e-24	0.218784	0.423597	-1.23924
FABP5	1.64973e-07	0.247	0.24	0.00553286	-1.67347	0.417297	-1.26085
HSPA1A	1.87639e-71	0.858	0.966	6.29303e-67	1.47232	0.381898	-1.38874
DES	5.33997e-93	0.306	0.668	1.79092e-88	-0.809092	0.375651	-1.41254
TPM2	2.73097e-96	0.613	0.882	9.15914e-92	0.175563	0.365021	-1.45395
ACTG2	1.83172e-92	0.328	0.699	6.14322e-88	-0.69748	0.360719	-1.47105
HSPA6	1.31577e-52	0.625	0.839	4.41283e-48	1.03572	0.358568	-1.47968
TAGLN	1.38753e-121	0.686	0.931	4.6535e-117	0.424229	0.32163	-1.63653
